# Supplementary material for: Intensive care unit caseload and workload and their association with outcomes in critically unwell patients: a large registry-based cohort analysis
Source: Springer Nature journal article supplement (doi:10.1186/s13054-024-05090-z), 2024-09-14
Supplement: MOESM1 [file 13054_2024_5090_MOESM1_ESM.pdf]

# Supplementary Materials

## Intensive Care Unit Caseload and Workload and their Association with Outcomes in Critically Unwell Patients: A Large Registry-Based Cohort Analysis

Paul ZAJIC, MD PhD<sup>1</sup>

Teresa ENGELBRECHT, BSc<sup>2</sup>

Alexandra GRAF, PhD<sup>2</sup>

Barbara METNITZ, PhD<sup>3</sup>

Rui MORENO, MD PhD<sup>4</sup>

Martin POSCH, PhD<sup>2</sup>

Andrew RHODES, MD<sup>5</sup>

Philipp METNITZ, MD PhD<sup>1,3</sup>

<sup>1</sup> Department of Anaesthesiology and Intensive Care Medicine, Medical University of Graz, Graz, Austria

<sup>2</sup> Center for Medical Data Science, Medical University of Vienna, Vienna, Austria

<sup>3</sup> Austrian Center for Documentation and Quality Assurance in Intensive Care, Vienna, Austria

<sup>4</sup> Hospital de São José, Unidade Local de Saúde São José, Lisbon, Portugal; Centro Clínico Académico de Lisboa, Lisbon, Portugal; Faculdade de Ciências da Saúde, Universidade da Beira Interior, Lisbon, Portugal

<sup>5</sup> Adult Critical Care, St. George's University Hospitals NHS Foundation Trust, St. George's University of London, London, United Kingdom

|                                                                                             |    |
|---------------------------------------------------------------------------------------------|----|
| Sensitivity Analysis: Interaction Term between Workload and Caseload .....                  | 2  |
| Sensitivity Analysis: “Moving Median” Up to Three Days .....                                | 4  |
| Sensitivity Analysis: ICU Identifier as Covariate.....                                      | 5  |
| Subgroup Analysis: Years 2013-2019.....                                                     | 6  |
| Subgroup Analysis: Years 2020-2022.....                                                     | 7  |
| Sensitivity Analysis: Interaction Terms for Years with Caseload and Workload .....          | 8  |
| Subgroup Analysis: ICU Type “Surgical” .....                                                | 9  |
| Subgroup Analysis: ICU Type “Medical” .....                                                 | 10 |
| Sensitivity Analysis: Interaction Terms for ICU Type with Caseload and Workload .....       | 11 |
| Subgroup Analysis: Hospital Level “Primary Care Hospital” .....                             | 12 |
| Subgroup Analysis: Hospital Level “Secondary Care Hospital” .....                           | 13 |
| Subgroup Analysis: Hospital Level “Specialised Care Hospital” .....                         | 14 |
| Subgroup Analysis: Hospital Level “Tertiary Care Hospital” .....                            | 15 |
| Sensitivity Analysis: Interaction Terms for Hospital Levels with Caseload and Workload..... | 16 |

## Sensitivity Analysis: Interaction Term between Workload and Caseload

Table S 1 Cox proportional hazards regression with ICU mortality as endpoint. The main variable of interest, an interaction between workload based on the TISS-28-Score and caseload based on bed occupancy was modelled as a time-dependent covariable. SAPS3, sex, year of discharge, type of ICU, time of day, and calendar day were also included in the model and ICUID serves as a cluster variable

|                                                                                                                   | HR   | lower | upper | p-value         |
|-------------------------------------------------------------------------------------------------------------------|------|-------|-------|-----------------|
| <b>SAPS3 [per point]</b>                                                                                          | 1.05 | 1.05  | 1.06  | < <b>0.0001</b> |
| <b>Hospital level: Reference: PRIM</b>                                                                            |      |       |       |                 |
| Secondary care hospital                                                                                           | 1.03 | 0.91  | 1.17  | 0.664           |
| Specialised care hospital                                                                                         | 0.74 | 0.62  | 0.87  | < <b>0.0001</b> |
| Tertiary care hospital                                                                                            | 0.91 | 0.74  | 1.12  | 0.366           |
| <b>Time of the day: Reference: 8:00-15:59</b>                                                                     |      |       |       |                 |
| 16:00-23:59                                                                                                       | 0.90 | 0.86  | 0.94  | < <b>0.0001</b> |
| 00:00-7:59                                                                                                        | 0.49 | 0.47  | 0.52  | < <b>0.0001</b> |
| <b>Type of ICU: Surgical vs Medical</b>                                                                           |      |       |       |                 |
|                                                                                                                   | 0.73 | 0.65  | 0.83  | < <b>0.0001</b> |
| <b>Year of discharge: Reference: 2013</b>                                                                         |      |       |       |                 |
| 2014                                                                                                              | 0.92 | 0.86  | 0.99  | <b>0.028</b>    |
| 2015                                                                                                              | 0.88 | 0.79  | 0.98  | <b>0.016</b>    |
| 2016                                                                                                              | 0.98 | 0.86  | 1.11  | 0.699           |
| 2017                                                                                                              | 0.97 | 0.87  | 1.08  | 0.571           |
| 2018                                                                                                              | 1.00 | 0.89  | 1.13  | 0.943           |
| 2019                                                                                                              | 0.93 | 0.82  | 1.05  | 0.255           |
| 2020                                                                                                              | 1.12 | 0.99  | 1.26  | 0.080           |
| 2021                                                                                                              | 1.13 | 0.99  | 1.28  | 0.066           |
| 2022                                                                                                              | 1.03 | 0.92  | 1.15  | 0.590           |
| <b>Current load based on current workload (TISS-28) &amp; current caseload [%]: Reference: 21-30 &amp; 76-100</b> |      |       |       |                 |
| ≤ 20 ; 76-100                                                                                                     | 0.84 | 0.70  | 1.02  | 0.072           |
| 31 to 40 ; 76-100                                                                                                 | 0.99 | 0.91  | 1.08  | 0.861           |
| > 40 ; 76-100                                                                                                     | 0.92 | 0.80  | 1.07  | 0.273           |
| 21 to 30 ; ≤ 50                                                                                                   | 1.06 | 0.96  | 1.17  | 0.255           |
| ≤ 20 ; ≤ 50                                                                                                       | 0.93 | 0.79  | 1.09  | 0.363           |
| 31 to 40 ; ≤ 50                                                                                                   | 1.10 | 0.99  | 1.21  | 0.078           |
| > 40 ; ≤ 50                                                                                                       | 0.98 | 0.82  | 1.17  | 0.835           |
| 21 to 30 ; 51-75                                                                                                  | 1.02 | 0.95  | 1.09  | 0.581           |
| ≤ 20 ; 51-75                                                                                                      | 0.97 | 0.81  | 1.16  | 0.729           |
| 31 to 40 ; 51-75                                                                                                  | 1.12 | 1.01  | 1.24  | <b>0.026</b>    |
| > 40 ; 51-75                                                                                                      | 1.07 | 0.91  | 1.25  | 0.438           |
| 21 to 30 ; > 100                                                                                                  | 1.06 | 0.96  | 1.17  | 0.270           |
| ≤ 20 ; > 100                                                                                                      | 0.96 | 0.74  | 1.24  | 0.747           |
| 31 to 40 ; > 100                                                                                                  | 1.05 | 0.92  | 1.20  | 0.450           |
| > 40 ; > 100                                                                                                      | 1.04 | 0.79  | 1.36  | 0.792           |
| <b>Sex: Male vs. Female</b>                                                                                       |      |       |       |                 |
|                                                                                                                   | 0.91 | 0.89  | 0.93  | < <b>0.0001</b> |
| <b>Non-working day vs. working day</b>                                                                            |      |       |       |                 |
|                                                                                                                   | 0.89 | 0.86  | 0.91  | < <b>0.0001</b> |

Figure S 1 Results of a Cox proportional hazards regression with ICU mortality as endpoint. The main variable of interest, an interaction between workload based on the TISS-28-Score and caseload based on bed occupancy was modelled as a time-dependent covariable and is depicted here. SAPS3, sex, year of discharge, type of ICU, time of day, and calendar day were also included in the model and ICUID serves as a cluster variable

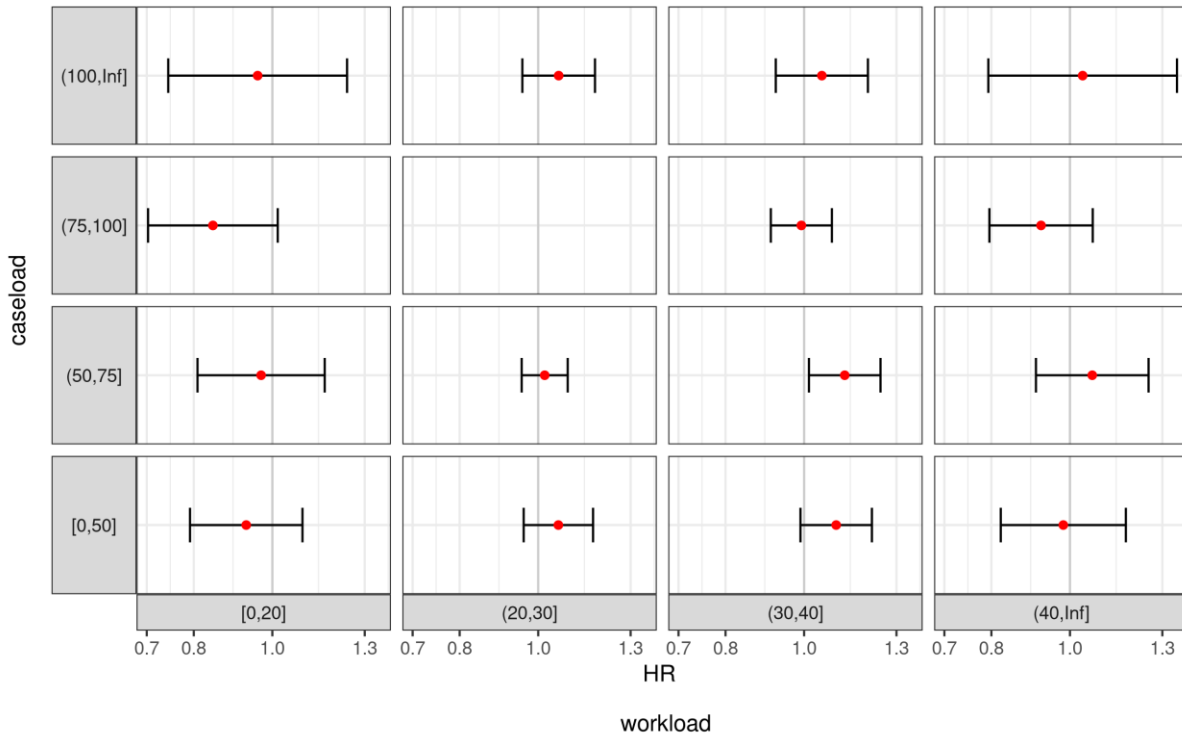

## Sensitivity Analysis: “Moving Median” Up to Three Days

Table S 2 Cox proportional hazards regression with ICU mortality as endpoint. The main variables of interest, workload based on median TISS-28-Score over up to 3 days and caseload based on median bed occupancy up to 3 days were modelled as time-dependent covariables. SAPS3, sex, year of discharge, hospital level, type of ICU, time of day, and calendar day were also included in the model and ICUID serves as a cluster variable.

|                                                                                          | HR   | lower | upper | p-value            |
|------------------------------------------------------------------------------------------|------|-------|-------|--------------------|
| <b>SAPS3 [per point]</b>                                                                 | 1.05 | 1.05  | 1.06  | <b>&lt; 0.0001</b> |
| <b>Hospital level (Reference: Primary care hospital)</b>                                 |      |       |       |                    |
| Secondary care hospital                                                                  | 1.02 | 0.90  | 1.15  | 0.794              |
| Specialised care hospital                                                                | 0.73 | 0.62  | 0.87  | <b>&lt; 0.0001</b> |
| Tertiary care hospital                                                                   | 0.89 | 0.73  | 1.09  | 0.259              |
| <b>Time of day (Reference: 08:00-15:59)</b>                                              |      |       |       |                    |
| 16:00-23:59                                                                              | 0.91 | 0.87  | 0.94  | <b>&lt; 0.0001</b> |
| 00:00-07:59                                                                              | 0.50 | 0.47  | 0.52  | <b>&lt; 0.0001</b> |
| <b>ICU type (Surgical vs. Medical)</b>                                                   |      |       |       |                    |
|                                                                                          | 0.73 | 0.64  | 0.83  | <b>&lt; 0.0001</b> |
| <b>Year of discharge (Reference: 2013)</b>                                               |      |       |       |                    |
| 2014                                                                                     | 0.92 | 0.85  | 0.99  | <b>0.026</b>       |
| 2015                                                                                     | 0.87 | 0.79  | 0.97  | <b>0.013</b>       |
| 2016                                                                                     | 0.97 | 0.86  | 1.10  | 0.675              |
| 2017                                                                                     | 0.97 | 0.87  | 1.08  | 0.551              |
| 2018                                                                                     | 1.00 | 0.89  | 1.13  | 0.936              |
| 2019                                                                                     | 0.93 | 0.82  | 1.06  | 0.259              |
| 2020                                                                                     | 1.12 | 0.99  | 1.27  | 0.065              |
| 2021                                                                                     | 1.12 | 0.99  | 1.27  | 0.072              |
| 2022                                                                                     | 1.04 | 0.93  | 1.16  | 0.469              |
| <b>Moving median (3 days) of caseload (bed occupancy) [%]: Reference: 76-100</b>         |      |       |       |                    |
| ≤ 50                                                                                     | 1.01 | 0.95  | 1.07  | 0.810              |
| 51-75                                                                                    | 1.03 | 0.98  | 1.08  | 0.262              |
| > 100                                                                                    | 1.09 | 0.99  | 1.19  | 0.069              |
| <b>Moving median (3 days) of workload of the others (TISS-28): (Reference: 21 to 30)</b> |      |       |       |                    |
| ≤ 20                                                                                     | 0.90 | 0.78  | 1.04  | 0.149              |
| 31 to 40                                                                                 | 1.05 | 0.97  | 1.14  | 0.219              |
| > 40                                                                                     | 1.01 | 0.89  | 1.15  | 0.893              |
| <b>Patient gender (Male vs. Female)</b>                                                  |      |       |       |                    |
|                                                                                          | 0.91 | 0.89  | 0.94  | <b>&lt; 0.0001</b> |
| <b>Calendar day (Non-working day vs. working day)</b>                                    |      |       |       |                    |
|                                                                                          | 0.89 | 0.86  | 0.92  | <b>&lt; 0.0001</b> |

## Sensitivity Analysis: ICU Identifier as Covariate

Table S 3 Cox proportional hazards regression with ICU mortality as endpoint. The main variables of interest, workload based on median TISS-28-Score of up to 3 days and caseload based on median bed occupancy of up to 3 days were modelled as time-dependent covariables. SAPS3, sex, year of discharge, time of day, and calendar day were also included in the model. ICUID serves as a covariate, but is not depicted.

|                                                                    | HR   | lower | upper | p-value  |
|--------------------------------------------------------------------|------|-------|-------|----------|
| <b>SAPS3 score</b>                                                 | 1.06 |       |       | < 0.0001 |
| <b>Time of the day (Reference: 8:00-15:59)</b>                     |      |       |       |          |
| 16:00-23:59                                                        | 0.90 | 0.88  | 0.92  | < 0.0001 |
| 00:00-7:59                                                         | 0.49 | 0.48  | 0.51  | < 0.0001 |
| <b>Year of discharge (Reference: 2013)</b>                         |      |       |       |          |
| 2014                                                               | 0.92 | 0.88  | 0.97  | 0.002    |
| 2015                                                               | 0.88 | 0.84  | 0.93  | < 0.0001 |
| 2016                                                               | 0.91 | 0.87  | 0.96  | < 0.0001 |
| 2017                                                               | 0.90 | 0.85  | 0.94  | < 0.0001 |
| 2018                                                               | 0.92 | 0.88  | 0.97  | 0.001    |
| 2019                                                               | 0.90 | 0.86  | 0.95  | < 0.0001 |
| 2020                                                               | 1.03 | 0.98  | 1.08  | 0.186    |
| 2021                                                               | 1.08 | 1.03  | 1.13  | 0.002    |
| 2022                                                               | 1.00 | 0.95  | 1.06  | 0.883    |
| <b>Current ICU Caseload (bed occupancy) [%]: Reference: 76-100</b> |      |       |       |          |
| ≤ 50                                                               | 1.09 | 1.05  | 1.13  | < 0.0001 |
| 51-75                                                              | 1.08 | 1.05  | 1.10  | < 0.0001 |
| > 100                                                              | 1.01 | 0.97  | 1.05  | 0.610    |
| <b>Patient gender (Male vs. Female)</b>                            |      |       |       |          |
|                                                                    | 0.90 | 0.88  | 0.92  | < 0.0001 |
| <b>Current ICU workload (TISS-28): Reference: 21 to 30</b>         |      |       |       |          |
| ≤ 20                                                               | 0.92 | 0.86  | 0.99  | 0.022    |
| 31 to 40                                                           | 1.00 | 0.98  | 1.03  | 0.739    |
| > 40                                                               | 0.95 | 0.89  | 1.01  | 0.085    |
| <b>Calendar day (Non-working day vs. working day)</b>              |      |       |       |          |
|                                                                    | 0.88 | 0.86  | 0.90  | < 0.0001 |

## Subgroup Analysis: Years 2013-2019

Table S 4 Cox proportional hazards regression with ICU mortality as endpoint. The main variables of interest, workload based on the TISS-28-Score and case-load based on bed occupancy were modelled as time-dependent covariables. SAPS3, sex, year of discharge, hospital level, type of ICU, time of day, and calendar day were also included in the model and ICUID serves as a cluster variable.

|                                                                        | HR   | lower | upper | p-value            |
|------------------------------------------------------------------------|------|-------|-------|--------------------|
| <b>SAPS3 [per point]</b>                                               | 1.05 | 1.05  | 1.06  | <b>&lt; 0.0001</b> |
| <b>Hospital level (Reference: Primary care hospital)</b>               |      |       |       |                    |
| Secondary care hospital                                                | 1.06 | 0.93  | 1.21  | 0.412              |
| Specialised care hospital                                              | 0.84 | 0.74  | 0.95  | <b>0.006</b>       |
| Tertiary care hospital                                                 | 0.93 | 0.77  | 1.13  | 0.485              |
| <b>Time of day (Reference: 08:00-15:59)</b>                            |      |       |       |                    |
| 16:00-23:59                                                            | 0.91 | 0.87  | 0.96  | <b>&lt; 0.0001</b> |
| 00:00-07:59                                                            | 0.51 | 0.48  | 0.54  | <b>&lt; 0.0001</b> |
| <b>ICU type (Surgical vs. Medical)</b>                                 |      |       |       |                    |
|                                                                        | 0.74 | 0.65  | 0.85  | <b>&lt; 0.0001</b> |
| <b>Year of discharge (Reference: 2013)</b>                             |      |       |       |                    |
| 2014                                                                   | 0.92 | 0.86  | 0.99  | <b>0.031</b>       |
| 2015                                                                   | 0.88 | 0.79  | 0.98  | <b>0.017</b>       |
| 2016                                                                   | 0.98 | 0.86  | 1.11  | 0.733              |
| 2017                                                                   | 0.97 | 0.87  | 1.08  | 0.599              |
| 2018                                                                   | 1.01 | 0.89  | 1.13  | 0.924              |
| 2019                                                                   | 0.93 | 0.82  | 1.05  | 0.240              |
| <b>Current ICU caseload (bed occupancy) [%] (Reference: 76 to 100)</b> |      |       |       |                    |
| ≤ 50                                                                   | 1.05 | 0.98  | 1.14  | 0.170              |
| 51-75                                                                  | 1.08 | 1.02  | 1.15  | <b>0.006</b>       |
| > 100                                                                  | 0.99 | 0.91  | 1.08  | 0.846              |
| <b>Patient gender (Male vs. Female)</b>                                |      |       |       |                    |
|                                                                        | 0.91 | 0.88  | 0.94  | <b>&lt; 0.0001</b> |
| <b>Current ICU workload (TISS-28) [points] (Reference: 21 to 30)</b>   |      |       |       |                    |
| ≤ 20                                                                   | 0.87 | 0.76  | 1.00  | <b>0.050</b>       |
| 31 to 40                                                               | 1.02 | 0.94  | 1.11  | 0.632              |
| > 40                                                                   | 0.93 | 0.81  | 1.06  | 0.279              |
| <b>Calendar day (Non-working day vs. working day)</b>                  |      |       |       |                    |
|                                                                        | 0.89 | 0.86  | 0.92  | <b>&lt; 0.0001</b> |

## Subgroup Analysis: Years 2020-2022

Table S 5 Cox proportional hazards regression with ICU mortality as endpoint. The main variables of interest, workload based on the TISS-28-Score and case-load based on bed occupancy were modelled as time-dependent covariables. SAPS3, sex, year of discharge, hospital level, type of ICU, time of day, and calendar day were also included in the model and ICUID serves as a cluster variable.

|                                                                        | HR   | lower | upper | p-value            |
|------------------------------------------------------------------------|------|-------|-------|--------------------|
| <b>SAPS3 [per point]</b>                                               | 1.05 | 1.05  | 1.06  | <b>&lt; 0.0001</b> |
| <b>Hospital level (Reference: Primary care hospital)</b>               |      |       |       |                    |
| Secondary care hospital                                                | 0.97 | 0.83  | 1.13  | 0.690              |
| Specialised care hospital                                              | 0.61 | 0.45  | 0.82  | <b>0.001</b>       |
| Tertiary care hospital                                                 | 0.87 | 0.66  | 1.15  | 0.336              |
| <b>Time of day (Reference: 08:00-15:59)</b>                            |      |       |       |                    |
| 16:00-23:59                                                            | 0.88 | 0.83  | 0.93  | <b>&lt; 0.0001</b> |
| 00:00-07:59                                                            | 0.47 | 0.44  | 0.50  | <b>&lt; 0.0001</b> |
| <b>ICU type (Surgical vs. Medical)</b>                                 |      |       |       |                    |
|                                                                        | 0.72 | 0.62  | 0.84  | <b>&lt; 0.0001</b> |
| <b>Year of discharge: Reference: 2020</b>                              |      |       |       |                    |
| 2021                                                                   | 1.01 | 0.95  | 1.08  | 0.764              |
| 2022                                                                   | 0.93 | 0.85  | 1.03  | 0.157              |
| <b>Current ICU caseload (bed occupancy) [%] (Reference: 76 to 100)</b> |      |       |       |                    |
| ≤ 50                                                                   | 1.16 | 1.07  | 1.27  | <b>&lt; 0.0001</b> |
| 51-75                                                                  | 1.14 | 1.08  | 1.21  | <b>&lt; 0.0001</b> |
| > 100                                                                  | 1.18 | 1.06  | 1.30  | <b>0.001</b>       |
| <b>Patient gender (Male vs. Female)</b>                                |      |       |       |                    |
|                                                                        | 0.91 | 0.88  | 0.95  | <b>&lt; 0.0001</b> |
| <b>Current ICU workload (TISS-28) [points] (Reference: 21 to 30)</b>   |      |       |       |                    |
| ≤ 20                                                                   | 0.91 | 0.77  | 1.07  | 0.262              |
| 31 to 40                                                               | 1.04 | 0.95  | 1.14  | 0.409              |
| > 40                                                                   | 1.01 | 0.84  | 1.20  | 0.952              |
| <b>Calendar day (Non-working day vs. working day)</b>                  |      |       |       |                    |
|                                                                        | 0.88 | 0.84  | 0.92  | <b>&lt; 0.0001</b> |

## Sensitivity Analysis: Interaction Terms for Years with Caseload and Workload

Table S 6 Cox proportional hazards regression with ICU mortality as endpoint. The main variables of interest, workload based on the TISS-28-Score and caseload based on bed occupancy were modelled as time-dependent covariables. Interaction terms between years 2013-2019 and 2020-2022 with caseload and workload were also included. SAPS3, sex, year of discharge, type of ICU, time of day, and calendar day were also included in the model and ICUID serves as a cluster variable

|                                                                              | HR   | lower | upper | p-value         |
|------------------------------------------------------------------------------|------|-------|-------|-----------------|
| <b>SAPS3 [per point]</b>                                                     | 1.05 | 1.05  | 1.06  | < <b>0.0001</b> |
| <b>Hospital level (Reference: Primary care hospital)</b>                     |      |       |       |                 |
| Secondary care hospital                                                      | 1.02 | 0.90  | 1.16  | 0.776           |
| Specialised care hospital                                                    | 0.72 | 0.61  | 0.86  | < <b>0.0001</b> |
| Tertiary care hospital                                                       | 0.90 | 0.73  | 1.11  | 0.336           |
| <b>Time of day (Reference: 08:00-15:59)</b>                                  |      |       |       |                 |
| 16:00-23:59                                                                  | 0.90 | 0.86  | 0.94  | < <b>0.0001</b> |
| 00:00-7:59                                                                   | 0.49 | 0.47  | 0.52  | < <b>0.0001</b> |
| <b>ICU type (Surgical vs. Medical)</b>                                       | 0.73 | 0.64  | 0.83  | < <b>0.0001</b> |
| <b>Years 2020 to 2022 vs. 2013 to 2019</b>                                   | 1.09 | 0.98  | 1.20  | 0.098           |
| <b>Years 2013 to 2019 : Current ICU caseload (bed occupancy) [%] 76-100</b>  |      |       |       |                 |
| 2020-2022 ; ≤ 50                                                             | 1.08 | 0.97  | 1.21  | 0.176           |
| 2020-2022 ; 51-75                                                            | 1.04 | 0.96  | 1.13  | 0.305           |
| 2020-2022 ; > 100                                                            | 1.19 | 1.06  | 1.34  | <b>0.003</b>    |
| <b>Current ICU caseload (bed occupancy) [%] (Reference: 76 to 100)</b>       |      |       |       |                 |
| ≤ 50                                                                         | 1.05 | 0.98  | 1.14  | 0.183           |
| 51-75                                                                        | 1.09 | 1.02  | 1.15  | <b>0.006</b>    |
| > 100                                                                        | 0.99 | 0.90  | 1.09  | 0.863           |
| <b>Patient gender (Male vs. Female)</b>                                      | 0.91 | 0.89  | 0.94  | < <b>0.0001</b> |
| <b>Current ICU workload (TISS-28) [points] (Reference: 21 to 30)</b>         |      |       |       |                 |
| ≤ 20                                                                         | 0.88 | 0.76  | 1.01  | 0.062           |
| 31 to 40                                                                     | 1.02 | 0.94  | 1.11  | 0.582           |
| > 40                                                                         | 0.92 | 0.81  | 1.05  | 0.234           |
| <b>Current ICU workload (TISS-28) [points] 21 to 30 : Years 2013 to 2019</b> |      |       |       |                 |
| ≤ 20 ; 2020-2022                                                             | 1.04 | 0.88  | 1.23  | 0.679           |
| 31 to 40 ; 2020-2022                                                         | 1.01 | 0.93  | 1.11  | 0.757           |
| >40 ; 2020-2022                                                              | 1.09 | 0.91  | 1.32  | 0.335           |
| <b>Calendar day (Non-working day vs. working day)</b>                        | 0.89 | 0.86  | 0.92  | < <b>0.0001</b> |



## Subgroup Analysis: ICU Type “Surgical”

Table S 7 Cox proportional hazards regression with ICU mortality as endpoint. The main variables of interest, workload based on the TISS-28-Score and case-load based on bed occupancy were modelled as time-dependent covariables. SAPS3, sex, year of discharge, hospital level, time of day, and calendar day were also included in the model and ICUID serves as a cluster variable.

|                                                                        | HR   | lower | upper | p-value            |
|------------------------------------------------------------------------|------|-------|-------|--------------------|
| <b>SAPS3 [per point]</b>                                               | 1.06 | 1.06  | 1.06  | <b>&lt; 0.0001</b> |
| <b>Hospital level (Reference: Primary care hospital)</b>               |      |       |       |                    |
| Secondary care hospital                                                | 1.05 | 0.91  | 1.21  | 0.479              |
| Specialised care hospital                                              | 0.72 | 0.57  | 0.91  | <b>0.005</b>       |
| Tertiary care hospital                                                 | 0.96 | 0.78  | 1.17  | 0.656              |
| <b>Time of day (Reference: 08:00-15:59)</b>                            |      |       |       |                    |
| 16:00-23:59                                                            | 0.89 | 0.84  | 0.94  | <b>&lt; 0.0001</b> |
| 00:00-07:59                                                            | 0.46 | 0.43  | 0.50  | <b>&lt; 0.0001</b> |
| <b>Year of discharge (Reference: 2013)</b>                             |      |       |       |                    |
| 2014                                                                   | 0.91 | 0.84  | 0.99  | <b>0.033</b>       |
| 2015                                                                   | 0.92 | 0.84  | 1.01  | 0.066              |
| 2016                                                                   | 1.01 | 0.90  | 1.13  | 0.924              |
| 2017                                                                   | 0.95 | 0.84  | 1.07  | 0.402              |
| 2018                                                                   | 0.98 | 0.84  | 1.14  | 0.766              |
| 2019                                                                   | 0.90 | 0.76  | 1.07  | 0.231              |
| 2020                                                                   | 1.12 | 0.96  | 1.31  | 0.139              |
| 2021                                                                   | 1.12 | 0.95  | 1.33  | 0.190              |
| 2022                                                                   | 1.04 | 0.91  | 1.20  | 0.544              |
| <b>Current ICU caseload (bed occupancy) [%] (Reference: 76 to 100)</b> |      |       |       |                    |
| ≤ 50                                                                   | 1.10 | 1.02  | 1.19  | <b>0.012</b>       |
| 51-75                                                                  | 1.09 | 1.04  | 1.13  | <b>&lt; 0.0001</b> |
| > 100                                                                  | 1.02 | 0.92  | 1.13  | 0.658              |
| <b>Patient gender (Male vs. Female)</b>                                |      |       |       |                    |
|                                                                        | 0.90 | 0.88  | 0.93  | <b>&lt; 0.0001</b> |
| <b>Current ICU workload (TISS-28) [points] (Reference: 21 to 30)</b>   |      |       |       |                    |
| ≤ 20                                                                   | 0.99 | 0.86  | 1.13  | 0.828              |
| 31 to 40                                                               | 0.99 | 0.93  | 1.06  | 0.837              |
| > 40                                                                   | 0.96 | 0.83  | 1.11  | 0.571              |
| <b>Calendar day (Non-working day vs. working day)</b>                  |      |       |       |                    |
|                                                                        | 0.89 | 0.85  | 0.94  | <b>&lt; 0.0001</b> |

## Subgroup Analysis: ICU Type “Medical”

Table S 8 Cox proportional hazards regression with ICU mortality as endpoint. The main variables of interest, workload based on the TISS-28-Score and case-load based on bed occupancy were modelled as time-dependent covariables. SAPS3, sex, year of discharge, hospital level, time of day, and calendar day were also included in the model and ICUID serves as a cluster variable.

|                                                                        | HR   | lower | upper | p-value            |
|------------------------------------------------------------------------|------|-------|-------|--------------------|
| <b>SAPS3 [per point]</b>                                               | 1.05 | 1.04  | 1.05  | <b>&lt; 0.0001</b> |
| <b>Hospital level (Reference: Primary care hospital)</b>               |      |       |       |                    |
| Secondary care hospital                                                | 1.03 | 0.83  | 1.27  | 0.818              |
| Specialised care hospital                                              | 0.78 | 0.65  | 0.93  | <b>0.006</b>       |
| Tertiary care hospital                                                 | 0.90 | 0.61  | 1.32  | 0.596              |
| <b>Time of day (Reference: 08:00-15:59)</b>                            |      |       |       |                    |
| 16:00-23:59                                                            | 0.91 | 0.86  | 0.97  | <b>0.006</b>       |
| 00:00-07:59                                                            | 0.53 | 0.50  | 0.57  | <b>&lt; 0.0001</b> |
| <b>Year of discharge (Reference: 2013)</b>                             |      |       |       |                    |
| 2014                                                                   | 0.93 | 0.83  | 1.04  | 0.210              |
| 2015                                                                   | 0.84 | 0.70  | 1.00  | 0.055              |
| 2016                                                                   | 0.94 | 0.76  | 1.16  | 0.569              |
| 2017                                                                   | 0.99 | 0.84  | 1.16  | 0.867              |
| 2018                                                                   | 1.02 | 0.86  | 1.22  | 0.800              |
| 2019                                                                   | 0.96 | 0.80  | 1.15  | 0.648              |
| 2020                                                                   | 1.10 | 0.92  | 1.31  | 0.320              |
| 2021                                                                   | 1.11 | 0.92  | 1.33  | 0.270              |
| 2022                                                                   | 1.01 | 0.85  | 1.20  | 0.886              |
| <b>Current ICU caseload (bed occupancy) [%] (Reference: 76 to 100)</b> |      |       |       |                    |
| ≤ 50                                                                   | 1.05 | 0.96  | 1.16  | 0.292              |
| 51-75                                                                  | 1.11 | 1.02  | 1.20  | <b>0.011</b>       |
| > 100                                                                  | 1.10 | 0.99  | 1.23  | 0.090              |
| <b>Patient gender (Male vs. Female)</b>                                | 0.92 | 0.89  | 0.96  | <b>&lt; 0.0001</b> |
| <b>Current ICU workload (TISS-28) [points] (Reference: 21 to 30)</b>   |      |       |       |                    |
| ≤ 20                                                                   | 0.80 | 0.68  | 0.95  | <b>0.010</b>       |
| 31 to 40                                                               | 1.09 | 0.96  | 1.23  | 0.190              |
| > 40                                                                   | 0.94 | 0.79  | 1.12  | 0.497              |
| <b>Calendar day (Non-working day vs. working day)</b>                  | 0.87 | 0.84  | 0.91  | <b>&lt; 0.0001</b> |

## Sensitivity Analysis: Interaction Terms for ICU Type with Caseload and Workload

Table S 9 Cox proportional hazards regression with ICU mortality as endpoint. The main variables of interest, workload based on the TISS-28-Score and caseload based on bed occupancy were modelled as time-dependent covariables. Interaction terms between ICU Types with caseload and workload were also included. SAPS3, sex, year of discharge, type of ICU, time of day, and calendar day were also included in the model and ICUID serves as a cluster variable

|                                                                           | HR   | lower | upper | p-value         |
|---------------------------------------------------------------------------|------|-------|-------|-----------------|
| <b>SAPS3 [per point]</b>                                                  | 1.05 | 1.05  | 1.06  | < <b>0.0001</b> |
| <b>Hospital level (Reference: Primary care hospital)</b>                  |      |       |       |                 |
| Secondary care hospital                                                   | 1.03 | 0.91  | 1.17  | 0.672           |
| Specialised care hospital                                                 | 0.73 | 0.62  | 0.86  | < <b>0.0001</b> |
| Tertiary care hospital                                                    | 0.91 | 0.74  | 1.12  | 0.356           |
| <b>Time of day (Reference: 08:00-15:59)</b>                               |      |       |       |                 |
| 16:00-23:59                                                               | 0.90 | 0.86  | 0.94  | < <b>0.0001</b> |
| 00:00-7:59                                                                | 0.49 | 0.47  | 0.52  | < <b>0.0001</b> |
| <b>ICU type (Surgical vs. Medical)</b>                                    | 0.74 | 0.63  | 0.88  | < <b>0.0001</b> |
| <b>ICU Type Medical : Current ICU caseload (bed occupancy) [%] 76-100</b> |      |       |       |                 |
| Surgical ; ≤ 50                                                           | 1.05 | 0.92  | 1.20  | 0.472           |
| Surgical ; 51-75                                                          | 0.98 | 0.90  | 1.08  | 0.705           |
| Surgical ; > 100                                                          | 0.88 | 0.75  | 1.04  | 0.140           |
| <b>Year of discharge (Reference: 2013)</b>                                |      |       |       |                 |
| 2014                                                                      | 0.92 | 0.86  | 0.99  | <b>0.031</b>    |
| 2015                                                                      | 0.88 | 0.79  | 0.98  | <b>0.016</b>    |
| 2016                                                                      | 0.98 | 0.86  | 1.11  | 0.724           |
| 2017                                                                      | 0.97 | 0.87  | 1.08  | 0.579           |
| 2018                                                                      | 1.00 | 0.89  | 1.13  | 0.946           |
| 2019                                                                      | 0.93 | 0.82  | 1.06  | 0.260           |
| 2020                                                                      | 1.12 | 0.99  | 1.26  | 0.071           |
| 2021                                                                      | 1.13 | 1.00  | 1.28  | 0.060           |
| 2022                                                                      | 1.03 | 0.92  | 1.16  | 0.563           |
| <b>Current ICU caseload (bed occupancy) [%] (Reference: 76 to 100)</b>    |      |       |       |                 |
| ≤ 50                                                                      | 1.05 | 0.95  | 1.17  | 0.311           |
| 51-75                                                                     | 1.11 | 1.02  | 1.20  | <b>0.011</b>    |
| > 100                                                                     | 1.15 | 1.01  | 1.30  | <b>0.031</b>    |
| <b>Patient gender (Male vs. Female)</b>                                   | 0.91 | 0.89  | 0.93  | < <b>0.0001</b> |
| <b>Current ICU workload (TISS-28) [points] (Reference: 21 to 30)</b>      |      |       |       |                 |
| ≤ 20                                                                      | 0.85 | 0.72  | 1.00  | <b>0.048</b>    |
| 31 to 40                                                                  | 1.04 | 0.92  | 1.17  | 0.541           |
| > 40                                                                      | 0.89 | 0.74  | 1.08  | 0.239           |
| <b>Current ICU workload (TISS-28) (20,30) : ICU Type Medical</b>          |      |       |       |                 |
| ≤ 20 ; Surgical                                                           | 1.12 | 0.91  | 1.39  | 0.273           |
| 31 to 40 ; Surgical                                                       | 0.99 | 0.86  | 1.13  | 0.837           |
| > 40 ; Surgical                                                           | 1.11 | 0.88  | 1.41  | 0.366           |
| <b>Calendar day (Non-working day vs. working day)</b>                     | 0.89 | 0.86  | 0.91  | < <b>0.0001</b> |

## Subgroup Analysis: Hospital Level “Primary Care Hospital”

Table S 10 Cox proportional hazards regression with ICU mortality as endpoint. The main variables of interest, workload based on the TISS-28-Score and caseload based on bed occupancy were modelled as time-dependent covariables. SAPS3, sex, year of discharge, type of ICU, time of day, and calendar day were also included in the model and ICUID serves as a cluster variable.

|                                                                        | HR   | lower | upper | p-value            |
|------------------------------------------------------------------------|------|-------|-------|--------------------|
| <b>SAPS3 [per point]</b>                                               | 1.06 | 1.06  | 1.06  | <b>&lt; 0.0001</b> |
| <b>Time of day (Reference: 08:00-15:59)</b>                            |      |       |       |                    |
| 16:00-23:59                                                            | 0.92 | 0.87  | 0.97  | <b>0.002</b>       |
| 00:00-07:59                                                            | 0.60 | 0.53  | 0.69  | <b>&lt; 0.0001</b> |
| <b>ICU type (Surgical vs. Medical)</b>                                 |      |       |       |                    |
|                                                                        | 0.65 | 0.53  | 0.79  | <b>&lt; 0.0001</b> |
| <b>Year of discharge (Reference: 2013)</b>                             |      |       |       |                    |
| 2014                                                                   | 0.92 | 0.75  | 1.14  | 0.455              |
| 2015                                                                   | 1.02 | 0.80  | 1.32  | 0.847              |
| 2016                                                                   | 1.06 | 0.84  | 1.34  | 0.638              |
| 2017                                                                   | 1.11 | 0.89  | 1.39  | 0.354              |
| 2018                                                                   | 1.13 | 0.92  | 1.39  | 0.240              |
| 2019                                                                   | 0.99 | 0.80  | 1.21  | 0.903              |
| 2020                                                                   | 1.26 | 1.00  | 1.58  | 0.052              |
| 2021                                                                   | 1.35 | 1.08  | 1.70  | <b>0.009</b>       |
| 2022                                                                   | 1.31 | 1.05  | 1.64  | <b>0.019</b>       |
| <b>Current ICU caseload (bed occupancy) [%] (Reference: 76 to 100)</b> |      |       |       |                    |
| ≤ 50                                                                   | 1.06 | 0.99  | 1.14  | 0.074              |
| 51-75                                                                  | 1.03 | 0.97  | 1.10  | 0.334              |
| > 100                                                                  | 1.08 | 0.97  | 1.20  | 0.160              |
| <b>Patient gender (Male vs. Female)</b>                                |      |       |       |                    |
|                                                                        | 0.98 | 0.92  | 1.04  | 0.494              |
| <b>Current ICU workload (TISS-28) [points] (Reference: 21 to 30)</b>   |      |       |       |                    |
| ≤ 20                                                                   | 0.93 | 0.81  | 1.06  | 0.250              |
| 31 to 40                                                               | 1.09 | 1.01  | 1.19  | <b>0.035</b>       |
| > 40                                                                   | 1.28 | 1.02  | 1.60  | <b>0.033</b>       |
| <b>Calendar day (Non-working day vs. working day)</b>                  |      |       |       |                    |
|                                                                        | 0.96 | 0.88  | 1.04  | 0.273              |

## Subgroup Analysis: Hospital Level “Secondary Care Hospital”

Table S 11 Cox proportional hazards regression with ICU mortality as endpoint. The main variables of interest, workload based on the TISS-28-Score and caseload based on bed occupancy were modelled as time-dependent covariables. SAPS3, sex, year of discharge, type of ICU, time of day, and calendar day were also included in the model and ICUID serves as a cluster variable.

|                                                                        | HR   | lower | upper | p-value            |
|------------------------------------------------------------------------|------|-------|-------|--------------------|
| <b>SAPS3 [per point]</b>                                               | 1.05 | 1.05  | 1.06  | <b>&lt; 0.0001</b> |
| <b>Time of day (Reference: 08:00-15:59)</b>                            |      |       |       |                    |
| 16:00-23:59                                                            | 0.91 | 0.86  | 0.97  | <b>0.004</b>       |
| 00:00-07:59                                                            | 0.48 | 0.46  | 0.51  | <b>&lt; 0.0001</b> |
| <b>ICU type (Surgical vs. Medical)</b>                                 |      |       |       |                    |
|                                                                        | 0.75 | 0.65  | 0.88  | <b>&lt; 0.0001</b> |
| <b>Year of discharge (Reference: 2013)</b>                             |      |       |       |                    |
| 2014                                                                   | 0.96 | 0.88  | 1.04  | 0.324              |
| 2015                                                                   | 0.87 | 0.76  | 0.99  | <b>0.042</b>       |
| 2016                                                                   | 0.93 | 0.79  | 1.10  | 0.394              |
| 2017                                                                   | 0.92 | 0.81  | 1.05  | 0.203              |
| 2018                                                                   | 0.96 | 0.83  | 1.12  | 0.622              |
| 2019                                                                   | 0.92 | 0.79  | 1.08  | 0.313              |
| 2020                                                                   | 1.05 | 0.91  | 1.20  | 0.512              |
| 2021                                                                   | 1.12 | 0.96  | 1.32  | 0.149              |
| 2022                                                                   | 1.03 | 0.90  | 1.18  | 0.683              |
| <b>Current ICU caseload (bed occupancy) [%] (Reference: 76 to 100)</b> |      |       |       |                    |
| ≤ 50                                                                   | 1.09 | 1.00  | 1.19  | 0.056              |
| 51-75                                                                  | 1.13 | 1.06  | 1.20  | <b>&lt; 0.0001</b> |
| > 100                                                                  | 1.05 | 0.96  | 1.15  | 0.300              |
| <b>Patient gender (Male vs. Female)</b>                                |      |       |       |                    |
|                                                                        | 0.90 | 0.87  | 0.92  | <b>&lt; 0.0001</b> |
| <b>Current ICU workload (TISS-28) [points] (Reference: 21 to 30)</b>   |      |       |       |                    |
| ≤ 20                                                                   | 0.75 | 0.54  | 1.03  | 0.073              |
| 31 to 40                                                               | 0.98 | 0.89  | 1.08  | 0.685              |
| > 40                                                                   | 0.90 | 0.78  | 1.04  | 0.143              |
| <b>Calendar day (Non-working day vs. working day)</b>                  |      |       |       |                    |
|                                                                        | 0.88 | 0.84  | 0.91  | <b>&lt; 0.0001</b> |

## Subgroup Analysis: Hospital Level “Specialised Care Hospital”

Table S 12 Cox proportional hazards regression with ICU mortality as endpoint. The main variables of interest, workload based on the TISS-28-Score and caseload based on bed occupancy were modelled as time-dependent covariables. SAPS3, sex, year of discharge, type of ICU, time of day, and calendar day were also included in the model and ICUID serves as a cluster variable.

|                                                                        | HR   | lower | upper | p-value            |
|------------------------------------------------------------------------|------|-------|-------|--------------------|
| <b>SAPS3 [per point]</b>                                               | 1.06 | 1.05  | 1.06  | <b>&lt; 0.0001</b> |
| <b>Time of day (Reference: 08:00-15:59)</b>                            |      |       |       |                    |
| 16:00-23:59                                                            | 1.01 | 0.91  | 1.11  | 0.919              |
| 00:00-07:59                                                            | 0.35 | 0.25  | 0.48  | <b>&lt; 0.0001</b> |
| <b>ICU type (Surgical vs. Medical)</b>                                 | 0.71 | 0.56  | 0.90  | <b>0.005</b>       |
| <b>Year of discharge (Reference: 2013)</b>                             |      |       |       |                    |
| 2014                                                                   | 1.09 | 0.95  | 1.25  | 0.239              |
| 2015                                                                   | 0.83 | 0.66  | 1.05  | 0.120              |
| 2016                                                                   | 1.03 | 0.90  | 1.18  | 0.703              |
| 2017                                                                   | 0.99 | 0.85  | 1.16  | 0.913              |
| 2018                                                                   | 0.98 | 0.83  | 1.16  | 0.842              |
| 2019                                                                   | 0.92 | 0.60  | 1.39  | 0.680              |
| 2020                                                                   | 0.89 | 0.41  | 1.93  | 0.763              |
| 2021                                                                   | 0.80 | 0.55  | 1.17  | 0.245              |
| 2022                                                                   | 0.99 | 0.75  | 1.31  | 0.948              |
| <b>Current ICU caseload (bed occupancy) [%] (Reference: 76 to 100)</b> |      |       |       |                    |
| ≤ 50                                                                   | 1.01 | 0.82  | 1.26  | 0.911              |
| 51-75                                                                  | 1.00 | 0.85  | 1.19  | 0.964              |
| > 100                                                                  | 1.03 | 0.77  | 1.38  | 0.855              |
| <b>Patient gender (Male vs. Female)</b>                                | 0.84 | 0.78  | 0.90  | <b>&lt; 0.0001</b> |
| <b>Current ICU workload (TISS-28) [points] (Reference: 21 to 30)</b>   |      |       |       |                    |
| ≤ 20                                                                   | 0.95 | 0.75  | 1.19  | 0.626              |
| 31 to 40                                                               | 0.84 | 0.68  | 1.04  | 0.105              |
| > 40                                                                   | 0.78 | 0.56  | 1.08  | 0.131              |
| <b>Calendar day (Non-working day vs. working day)</b>                  | 0.82 | 0.70  | 0.97  | <b>0.017</b>       |

## Subgroup Analysis: Hospital Level “Tertiary Care Hospital”

Table S 13 Cox proportional hazards regression with ICU mortality as endpoint. The main variables of interest, workload based on the TISS-28-Score and caseload based on bed occupancy were modelled as time-dependent covariables. SAPS3, sex, year of discharge, type of ICU, time of day, and calendar day were also included in the model and ICUID serves as a cluster variable.

|                                                                        | HR   | lower | upper | p-value            |
|------------------------------------------------------------------------|------|-------|-------|--------------------|
| <b>SAPS3 [per point]</b>                                               | 1.05 | 1.04  | 1.06  | <b>&lt; 0.0001</b> |
| <b>Time of day (Reference: 08:00-15:59)</b>                            |      |       |       |                    |
| 16:00-23:59                                                            | 0.78 | 0.70  | 0.86  | <b>&lt; 0.0001</b> |
| 00:00-07:59                                                            | 0.45 | 0.39  | 0.52  | <b>&lt; 0.0001</b> |
| <b>ICU type (Surgical vs. Medical)</b>                                 | 0.69 | 0.42  | 1.13  | 0.140              |
| <b>Year of discharge (Reference: 2013)</b>                             |      |       |       |                    |
| 2014                                                                   | 0.77 | 0.63  | 0.93  | <b>0.006</b>       |
| 2015                                                                   | 0.84 | 0.64  | 1.08  | 0.176              |
| 2016                                                                   | 1.18 | 0.82  | 1.71  | 0.366              |
| 2017                                                                   | 1.11 | 0.77  | 1.62  | 0.572              |
| 2018                                                                   | 1.16 | 0.77  | 1.76  | 0.471              |
| 2019                                                                   | 0.98 | 0.58  | 1.64  | 0.932              |
| 2020                                                                   | 1.45 | 0.97  | 2.18  | 0.072              |
| 2021                                                                   | 1.24 | 0.80  | 1.91  | 0.336              |
| 2022                                                                   | 0.75 | 0.55  | 1.03  | 0.073              |
| <b>Current ICU caseload (bed occupancy) [%] (Reference: 76 to 100)</b> |      |       |       |                    |
| ≤ 50                                                                   | 1.11 | 0.91  | 1.35  | 0.310              |
| 51-75                                                                  | 1.12 | 1.03  | 1.21  | <b>0.006</b>       |
| > 100                                                                  | 1.05 | 0.85  | 1.29  | 0.678              |
| <b>Patient gender (Male vs. Female)</b>                                | 0.88 | 0.83  | 0.94  | <b>&lt; 0.0001</b> |
| <b>Current ICU workload (TISS-28) [points] (Reference: 21 to 30)</b>   |      |       |       |                    |
| ≤ 20                                                                   | 1.12 | 0.79  | 1.59  | 0.519              |
| 31 to 40                                                               | 1.16 | 0.87  | 1.54  | 0.307              |
| > 40                                                                   | 1.04 | 0.73  | 1.48  | 0.817              |
| <b>Calendar day (Non-working day vs. working day)</b>                  | 0.84 | 0.78  | 0.90  | <b>&lt; 0.0001</b> |

## Sensitivity Analysis: Interaction Terms for Hospital Levels with Caseload and Workload

Table S 14 Cox proportional hazards regression with ICU mortality as endpoint. The main variables of interest, workload based on the TISS-28-Score and caseload based on bed occupancy were modelled as time-dependent covariables. Interaction terms between Hospital Levels with caseload and workload were also included. SAPS3, sex, year of discharge, type of ICU, time of day, and calendar day were also included in the model and ICUID serves as a cluster variable

|                                                                                                     | HR   | lower | upper | p-value            |
|-----------------------------------------------------------------------------------------------------|------|-------|-------|--------------------|
| <b>SAPS3 [per point]</b>                                                                            | 1.05 | 1.05  | 1.06  | <b>&lt; 0.0001</b> |
| <b>Time of day (Reference: 08:00-15:59)</b>                                                         |      |       |       |                    |
| Secondary care hospital                                                                             | 1.11 | 0.93  | 1.32  | 0.231              |
| Specialised care hospital                                                                           | 0.92 | 0.75  | 1.13  | 0.425              |
| Tertiary care hospital                                                                              | 0.88 | 0.71  | 1.09  | 0.251              |
| <b>Hospital level: Primary care hospital &amp; Current ICU Caseload (bed occupancy) [%]: 76-100</b> |      |       |       |                    |
| Secondary care hospital ; ≤ 50                                                                      | 0.99 | 0.88  | 1.11  | 0.808              |
| Specialised care hospital ; ≤ 50                                                                    | 0.89 | 0.66  | 1.21  | 0.460              |
| Tertiary care hospital ; ≤ 50                                                                       | 1.02 | 0.83  | 1.25  | 0.835              |
| Secondary care hospital ; 51-75                                                                     | 1.08 | 0.99  | 1.17  | 0.101              |
| Specialised care hospital ; 51-75                                                                   | 0.96 | 0.78  | 1.17  | 0.660              |
| Tertiary care hospital ; 51-75                                                                      | 1.05 | 0.95  | 1.16  | 0.339              |
| Secondary care hospital ; > 100                                                                     | 0.99 | 0.86  | 1.14  | 0.907              |
| Specialised care hospital ; > 100                                                                   | 0.89 | 0.63  | 1.24  | 0.481              |
| Tertiary care hospital ; > 100                                                                      | 0.96 | 0.73  | 1.26  | 0.753              |
| <b>Time of day (Reference: 08:00-15:59)</b>                                                         |      |       |       |                    |
| 16:00-23:59                                                                                         | 0.90 | 0.86  | 0.94  | <b>&lt; 0.0001</b> |
| 00:00-7:59                                                                                          | 0.49 | 0.47  | 0.52  | <b>&lt; 0.0001</b> |
| <b>ICU type (Surgical vs. Medical)</b>                                                              |      |       |       |                    |
|                                                                                                     | 0.73 | 0.65  | 0.83  | <b>&lt; 0.0001</b> |
| <b>Year of discharge: Reference: 2013</b>                                                           |      |       |       |                    |
| 2014                                                                                                | 0.92 | 0.86  | 0.99  | <b>0.027</b>       |
| 2015                                                                                                | 0.88 | 0.79  | 0.98  | <b>0.017</b>       |
| 2016                                                                                                | 0.98 | 0.86  | 1.11  | 0.727              |
| 2017                                                                                                | 0.97 | 0.88  | 1.08  | 0.621              |
| 2018                                                                                                | 1.01 | 0.90  | 1.13  | 0.890              |
| 2019                                                                                                | 0.93 | 0.82  | 1.06  | 0.269              |
| 2020                                                                                                | 1.12 | 1.00  | 1.27  | 0.058              |
| 2021                                                                                                | 1.14 | 1.00  | 1.29  | <b>0.046</b>       |
| 2022                                                                                                | 1.04 | 0.93  | 1.16  | 0.515              |
| <b>Current ICU caseload (bed occupancy) [%] (Reference: 76 to 100)</b>                              |      |       |       |                    |
| ≤ 50                                                                                                | 1.09 | 1.01  | 1.18  | <b>0.020</b>       |
| 51-75                                                                                               | 1.04 | 0.98  | 1.11  | 0.194              |
| > 100                                                                                               | 1.07 | 0.97  | 1.19  | 0.185              |
| <b>Patient gender (Male vs. Female)</b>                                                             |      |       |       |                    |
|                                                                                                     | 0.91 | 0.89  | 0.93  | <b>&lt; 0.0001</b> |
| <b>Current ICU workload (TISS-28) [points] (Reference: 21 to 30)</b>                                |      |       |       |                    |
| ≤ 20                                                                                                | 0.93 | 0.82  | 1.06  | 0.260              |
| 31 to 40                                                                                            | 1.13 | 1.04  | 1.22  | <b>0.006</b>       |
| > 40                                                                                                | 1.31 | 1.05  | 1.63  | <b>0.018</b>       |



|                                                                                             | HR   | lower | upper | p-value            |
|---------------------------------------------------------------------------------------------|------|-------|-------|--------------------|
| <b>Hospital level: Primary Care Hospital &amp; Current ICU Workload (TISS-28): 21 to 30</b> |      |       |       |                    |
| Secondary care hospital ; ≤ 20                                                              | 0.82 | 0.58  | 1.14  | 0.232              |
| Secondary care hospital ; 31 to 40                                                          | 0.86 | 0.76  | 0.99  | <b>0.031</b>       |
| Secondary care hospital ; >40                                                               | 0.68 | 0.52  | 0.89  | <b>0.005</b>       |
| Specialised care hospital ; ≤ 20                                                            | 1.00 | 0.76  | 1.32  | 0.976              |
| Specialised care hospital ; 31 to 40                                                        | 0.75 | 0.61  | 0.92  | <b>0.006</b>       |
| Specialised care hospital ; > 40                                                            | 0.62 | 0.44  | 0.86  | <b>0.005</b>       |
| Tertiary care hospital ; ≤ 20                                                               | 1.26 | 0.91  | 1.77  | 0.168              |
| Tertiary care hospital ; 31 to 40                                                           | 1.01 | 0.83  | 1.23  | 0.917              |
| Tertiary care hospital ; > 40                                                               | 0.74 | 0.54  | 1.03  | 0.071              |
| <b>Calendar day (Non-working day vs. working day)</b>                                       | 0.89 | 0.86  | 0.91  | <b>&lt; 0.0001</b> |
